# Supplementary material for: Gene Duplication Analysis Reveals No Ancient Whole Genome Duplication but Extensive Small-Scale Duplications during Genome Evolution and Adaptation of Schistosoma mansoni
Source: Front Cell Infect Microbiol. 2017 Sep 21;7:412. doi: 10.3389/fcimb.2017.00412 (PMC5613093; doi:10.3389/fcimb.2017.00412)
Supplement: Supplementary Table 1 — Functional annotations of putative retrogenes and their parental genes. [file Table1.XLSX]

## Sheet: retro_annotation
Supplementary Table 1. Functional annoations of putative retrogenes and their parental genes.
Retrogene	Parental gene	Annotation
Smp_000620	Smp_067430	class E basic helix loop helix protein 23
Smp_000690	Smp_149570	brain specific homeobox:POU domain protein 3
Smp_001330	Smp_122750	protein jagged 1
Smp_005140	Smp_163920	hemicentin 1
Smp_006930	Smp_102400	beta 1 3 galactosyltransferase brn
Smp_007670	Smp_075030	hypothetical protein
Smp_009040	Smp_149570	POU domain%2C class 4%2C transcription factor 2
Smp_010720	Smp_130370	elongation of fatty acids protein 1
Smp_015920	Smp_007950	beta 1%2C4 galactosyltransferase 4
Smp_018170	Smp_165420	zinc finger protein
Smp_022330	Smp_078800	dnaJ subfamily B
Smp_024650	Smp_007950	beta 1%2C4 galactosyltransferase 4
Smp_027370	Smp_159540	NEDD8 conjugating enzyme UBE2F
Smp_027940	Smp_137320	amine GPCR
Smp_029620	Smp_140730	homeobox protein SMOX 4
Smp_029850	Smp_051420	three prime histone mRNA exonuclease 1
Smp_030350	Smp_194090	serine protease SmSP1 light chain
Smp_032750	Smp_016250	guanine nucleotide binding protein G(i) alpha
Smp_035160	Smp_160780	potassium voltage gated channel subfamily D
Smp_038530	Smp_169960	dual specificity protein phosphatase 14
Smp_039010	Smp_149030	hypothetical protein
Smp_039600	Smp_137750	calbindin 32
Smp_040390	Smp_165420	transcription factor Sp8
Smp_043290	Smp_059400	Tyramine:octopamine receptor
Smp_043420	Smp_165420	zinc finger protein
Smp_043580	Smp_144180	histone lysine N methyltransferase SETMAR
Smp_043920	Smp_210200	tubulin polyglutamylase TTLL1
Smp_043930	Smp_214030	metallo beta lactamase domain containing protein
Smp_044870	Smp_145470	zinc finger protein
Smp_046120	Smp_121920	vesicular acetylcholine transporter
Smp_046360	Smp_165420	Zinc finger protein 143
Smp_046600	Smp_161920	actin
Smp_046780	Smp_009310	plasminogen activator inhibitor 1 RNA binding
Smp_051670	Smp_165890	rab interacting protein%3B multidrug resistance protein
Smp_053420	Smp_070640	fermitin family 1
Smp_054350	Smp_133480	Forkhead box protein D3
Smp_054430	Smp_165420	hypothetical protein
Smp_054440	Smp_139470	tensin
Smp_056080	Smp_056060	rhodopsin orphan GPCR
Smp_060760	Smp_210630	histone H2A
Smp_061500	Smp_037930	hypothetical protein
Smp_062240	Smp_168860	RNA binding protein
Smp_063790	Smp_100090	high mobility group protein B1
Smp_066930	Smp_165420	transcription factor sp9
Smp_069120	Smp_159640	synaptotagmin 2
Smp_069720	Smp_135610	cadherin
Smp_070170	Smp_027300	mixed lineage leukemia protein mll
Smp_072100	Smp_133320	CCR4 NOT transcription complex subunit 1
Smp_072800	Smp_078220	DNA directed RNA polymerase I
Smp_074610	Smp_169450	histone H3
Smp_075400	Smp_075390	hypothetical protein
Smp_075420	Smp_075390	hypothetical protein
Smp_075430	Smp_162840	hypothetical protein
Smp_077400	Smp_044470	autophagy protein 3
Smp_077850	Smp_072870	actin
Smp_077860	Smp_161920	actin
Smp_078010	Smp_201220	casein kinase
Smp_078540	Smp_139610	hypothetical protein
Smp_079010	Smp_131050	cAMP dependent protein kinase type II regulatory
Smp_079480	Smp_074190	hypothetical protein
Smp_079640	Smp_130780	monocarboxylate transporter
Smp_081030	Smp_072440	Gag protein
Smp_081190	Smp_104110	GTP binding protein rhoA
Smp_081660	Smp_165420	zinc finger protein
Smp_082240	Smp_169450	histone H3
Smp_082820	Smp_159540	Ubiquitin conjugating enzyme E2 11
Smp_084270	Smp_196080	rhodopsin orphan GPCR
Smp_084330	Smp_144740	lamin
Smp_085690	Smp_152330	cAMP dependent protein kinase catalytic subunit
Smp_085700	Smp_153170	cAMP dependent protein kinase catalytic subunit
Smp_086830	Smp_122810	mechanosensory protein 2
Smp_086860	Smp_210630	histone H2A
Smp_087320	Smp_141360	TPA induced protein 11B mouse
Smp_089380	Smp_170890	Cell wall integrity and stress response
Smp_089430	Smp_009580	ubiquitin (ribosomal protein L40)
Smp_089860	Smp_169450	histone H3
Smp_092580	Smp_059340	guanine nucleotide binding protein G(s) subunit
Smp_093620	Smp_137450	hypothetical protein
Smp_094250	Smp_154440	3 phosphoinositide dependent protein kinase 1
Smp_094480	Smp_063640	guanine nucleotide binding protein subunit beta
Smp_094560	Smp_160780	Kv4 class voltage gated potassium channel
Smp_094930	Smp_165420	early growth response protein 1
Smp_095350	Smp_165400	acetyl coenzyme A carboxylase%3B methylcrotonyl CoA
Smp_096910	Smp_151520	dolichyl pyrophosphate Man9GlcNAc2
Smp_096920	Smp_163540	FHA modulated ABC efflux pump with fused ATPase
Smp_097490	Smp_212780	tubulin polymerization promoting protein family
Smp_100790	Smp_160980	hypothetical protein
Smp_101990	Smp_012000	acetylcholine receptor subunit alpha
Smp_102190	Smp_178940	steroid dehydrogenase
Smp_105480	Smp_088650	ADP ribosylation factor protein 6 like
Smp_110560	Smp_137240	phosphatidylserine receptor
Smp_112170	Smp_108360	hypothetical protein
Smp_112590	Smp_186540	receptor type adenylate cyclase GRESAG 4
Smp_113460	Smp_186540	receptor type adenylate cyclase GRESAG
Smp_114430	Smp_170890	NAD dependent epimerase:dehydratase
Smp_114540	Smp_142900	hypothetical protein
Smp_114870	Smp_096830	hypothetical protein
Smp_116290	Smp_094660	phosphate transporter
Smp_116800	Smp_108050	myosin binding protein
Smp_117340	Smp_023710	peptide (allatostatin:somatostatin)
Smp_117560	Smp_099090	hypothetical protein
Smp_117990	Smp_176350	reverse transcriptase
Smp_118960	Smp_067520	jun protein
Smp_118970	Smp_139180	frizzled
Smp_119260	Smp_166720	hypothetical protein
Smp_119580	Smp_134700	uncharacterized MFS type transporter C19orf28
Smp_120020	Smp_096830	hypothetical protein
Smp_120050	Smp_164170	endoglycoceramidase
Smp_120180	Smp_168940	NAD dependent epimerase:dehydratase
Smp_121130	Smp_061250	mitochondrial carrier triple repeat protein
Smp_122060	Smp_127190	hypothetical protein
Smp_122320	Smp_160980	hypothetical protein
Smp_123400	Smp_160980	hypothetical protein
Smp_124470	Smp_097460	soluble guanylyl cyclase beta 3
Smp_126570	Smp_160980	hypothetical protein
Smp_127260	Smp_160980	hypothetical protein
Smp_127860	Smp_157640	fmrfamide receptor
Smp_131450	Smp_027610	ribosomal protein S3
Smp_131750	Smp_160980	hypothetical protein
Smp_132110	Smp_160980	hypothetical protein
Smp_132760	Smp_040270	hypothetical protein
Smp_132960	Smp_160980	hypothetical protein
Smp_135700	Smp_159180	gamma tubulin complex component 3 (gcp 3)
Smp_137300	Smp_137320	amine GPCR
Smp_137310	Smp_137320	amine GPCR
Smp_137980	Smp_153210	rhodopsin orphan GPCR
Smp_138650	Smp_160980	hypothetical protein
Smp_139870	Smp_160980	hypothetical protein
Smp_140280	Smp_160980	hypothetical protein
Smp_141260	Smp_099090	hypothetical protein
Smp_141870	Smp_160980	hypothetical protein
Smp_143060	Smp_019990	clathrin coat assembly protein ap17
Smp_143870	Smp_127510	hypothetical protein
Smp_144150	Smp_160980	hypothetical protein
Smp_145340	Smp_160980	hypothetical protein
Smp_147130	Smp_160980	hypothetical protein
Smp_148610	Smp_148620	hypothetical protein
Smp_150000	Smp_160980	hypothetical protein
Smp_151130	Smp_179740	hypothetical protein
Smp_151170	Smp_160980	hypothetical protein
Smp_151200	Smp_151210	85 kDa calcium independent phospholipase A2
Smp_153200	Smp_153210	rhodopsin orphan GPCR
Smp_153390	Smp_153340	ectonucleotide pyrophosphatase:phosphodiesterase
Smp_154960	Smp_140180	transmembrane emp domain containing protein
Smp_155660	Smp_160980	hypothetical protein
Smp_155710	Smp_160980	hypothetical protein
Smp_157270	Smp_165420	zinc finger protein ZIC 5
Smp_157370	Smp_154440	ribosomal protein s kinase alpha
Smp_159610	Smp_160980	hypothetical protein
Smp_160720	Smp_160980	hypothetical protein
Smp_160990	Smp_160980	hypothetical protein
Smp_161690	Smp_160980	hypothetical protein
Smp_162370	Smp_003770	histone H1 gamma%2C late
Smp_162520	Smp_135610	protocadherin fat 4
Smp_162950	Smp_160980	hypothetical protein
Smp_165570	Smp_163580	ras dva small gtpase
Smp_167710	Smp_195160	pol polyprotein
Smp_167720	Smp_160980	hypothetical protein
Smp_167840	Smp_002860	hypothetical protein
Smp_168290	Smp_159180	gamma tubulin complex component 3 (gcp 3)
Smp_168490	Smp_174910	importin alpha
Smp_170190	Smp_160980	hypothetical protein
Smp_170230	Smp_078240	rna recognition motif containing protein
Smp_172230	Smp_160980	hypothetical protein
Smp_172480	Smp_165420	Krueppel factor 10 like
Smp_173310	Smp_160980	hypothetical protein
Smp_174460	Smp_160980	hypothetical protein
Smp_175080	Smp_160980	hypothetical protein
Smp_175140	Smp_153170	Serine:threonine protein kinase par 1
Smp_175820	Smp_159720	atpase class VI type 11c
Smp_176190	Smp_170890	NAD dependent epimerase:dehydratase
Smp_177520	Smp_173140	hypothetical protein
Smp_177720	Smp_083950	rhodopsin orphan GPCR
Smp_178320	Smp_099090	protein disulfide isomerase
Smp_178400	Smp_096830	hypothetical protein
Smp_178420	Smp_137320	amine GPCR
Smp_178530	Smp_195120	KRAB A domain containing protein
Smp_179530	Smp_139730	gag pol polyprotein
Smp_179640	Smp_160980	hypothetical protein
Smp_180780	Smp_187410	hypothetical protein
Smp_180820	Smp_161600	HMG transcription factor SoxB1
Smp_181910	Smp_164170	hypothetical protein
Smp_182880	Smp_152840	hypothetical protein
Smp_182910	Smp_195160	gag pol polyprotein
Smp_183130	Smp_149910	liprin alpha 2
Smp_183420	Smp_160980	hypothetical protein
Smp_183710	Smp_161920	actin
Smp_185870	Smp_160980	hypothetical protein
Smp_185890	Smp_157510	Gag protein
Smp_185930	Smp_172150	hypothetical protein
Smp_186170	Smp_157510	Gag protein
Smp_187070	Smp_164170	hypothetical protein
Smp_187360	Smp_154670	glycosyltransferase 14 family member
Smp_188780	Smp_187410	hypothetical protein
Smp_189050	Smp_172150	hypothetical protein
Smp_189170	Smp_160980	hypothetical protein
Smp_189380	Smp_126870	homeobox protein distal less
Smp_189480	Smp_160980	hypothetical protein
Smp_189980	Smp_160980	hypothetical protein
Smp_190540	Smp_160980	hypothetical protein
Smp_190710	Smp_160980	hypothetical protein
Smp_190740	Smp_172150	hypothetical protein
Smp_190760	Smp_160980	hypothetical protein
Smp_192030	Smp_199470	atp binding cassette transporter
Smp_192080	Smp_163820	atpase%2C class VI%2C type 11c
Smp_192490	Smp_055240	cadherin
Smp_192670	Smp_174390	serine threonine kinase receptor associated
Smp_192880	Smp_160980	hypothetical protein
Smp_192890	Smp_173140	hypothetical protein
Smp_193400	Smp_187410	hypothetical protein
Smp_193630	Smp_164170	endoglycoceramidase
Smp_193950	Smp_160980	hypothetical protein
Smp_194000	Smp_195160	pol polyprotein
Smp_194180	Smp_187410	hypothetical protein
Smp_194490	Smp_163090	voltage gated potassium channel
Smp_194950	Smp_175930	ELAV protein 2
Smp_194990	Smp_137740	alpha(13)fucosyltransferase
Smp_195040	Smp_149130	plastin 2
Smp_195110	Smp_195150	KRAB A domain containing protein
Smp_197110	Smp_154080	gag pol polyprotein
Smp_198040	Smp_160980	hypothetical protein
Smp_199910	Smp_176470	protocadherin gamma subfamily
Smp_200450	Smp_014260	UDP GlcNAc:betaGal
Smp_200870	Smp_200820	hypothetical protein
Smp_200880	Smp_200820	hypothetical protein
Smp_201310	Smp_150930	Alkylated repair protein alkB 7
Smp_201760	Smp_073070	palmitoyltransferase zdhhc5
Smp_202470	Smp_148210	dopamine receptor D1AlphaHom
Smp_202970	Smp_161920	cytoplasmic actin
Smp_203130	Smp_161920	Actin 5C
Smp_203220	Smp_131420	testis specific protein pbs13
Smp_203400	Smp_196080	rhodopsin orphan GPCR
Smp_204550	Smp_196080	rhodopsin orphan GPCR
Smp_205450	Smp_205460	hypothetical protein
Smp_212320	Smp_157740	DNA directed RNA polymerase III subunit RPC1
