# Supplementary material for: Gene Duplication Analysis Reveals No Ancient Whole Genome Duplication but Extensive Small-Scale Duplications during Genome Evolution and Adaptation of Schistosoma mansoni
Source: Front Cell Infect Microbiol. 2017 Sep 21;7:412. doi: 10.3389/fcimb.2017.00412 (PMC5613093; doi:10.3389/fcimb.2017.00412)
Supplement: Supplementary Table 2 — The significantly enriched GO terms of dispersedly duplicated genes (FDR < 0.05). [file Table2.XLSX]

## Sheet: Supplemenatry Table 1
Supplementary Table 2. The significantly enriched GO terms of dispersedly duplicated genes (FDR <0.05).
GO-ID	Term	Category	FDR	P-Value
GO:0001882	nucleoside binding	F	2.79e-61	8.81e-65
GO:0032549	ribonucleoside binding	F	2.79e-61	1.68e-64
GO:0017076	purine nucleotide binding	F	3.1e-61	2.79e-64
GO:0035639	purine ribonucleoside triphosphate binding	F	3.89e-61	4.69e-64
GO:0032550	purine ribonucleoside binding	F	5.46e-61	1.15e-63
GO:0001883	purine nucleoside binding	F	5.46e-61	1.15e-63
GO:0032555	purine ribonucleotide binding	F	5.46e-61	1.15e-63
GO:0097367	carbohydrate derivative binding	F	8.12e-60	1.95e-62
GO:0032553	ribonucleotide binding	F	1.46e-59	3.96e-62
GO:0043168	anion binding	F	9.82e-52	2.95e-54
GO:1901265	nucleoside phosphate binding	F	7.31e-51	2.64e-53
GO:0000166	nucleotide binding	F	7.31e-51	2.64e-53
GO:0036094	small molecule binding	F	1.3e-49	5.09e-52
GO:0043167	ion binding	F	5.98e-48	2.52e-50
GO:0005524	ATP binding	F	1.18e-47	5.34e-50
GO:0032559	adenyl ribonucleotide binding	F	2.65e-47	1.28e-49
GO:0030554	adenyl nucleotide binding	F	5.93e-47	3.03e-49
GO:1901363	heterocyclic compound binding	F	1.32e-36	7.15e-39
GO:0097159	organic cyclic compound binding	F	1.87e-36	1.07e-38
GO:0005488	binding	F	1.17e-22	7.01e-25
GO:0006468	protein phosphorylation	P	3.57e-19	2.26e-21
GO:0004672	protein kinase activity	F	4.51e-19	2.98e-21
GO:0016817	hydrolase activity, acting on acid anhydrides	F	1.1e-16	7.61e-19
GO:0017111	nucleoside-triphosphatase activity	F	1.19e-16	8.61e-19
GO:0016310	phosphorylation	P	1.03e-15	7.75e-18
GO:0016818	hydrolase activity, acting on acid anhydrides, in phosphorus-containing anhydrides	F	1.46e-15	1.15e-17
GO:0016462	pyrophosphatase activity	F	2.41e-15	1.96e-17
GO:0006464	cellular protein modification process	P	9.14e-15	7.97e-17
GO:0036211	protein modification process	P	9.14e-15	7.97e-17
GO:0016301	kinase activity	F	1.51e-14	1.36e-16
GO:0016773	phosphotransferase activity, alcohol group as acceptor	F	2.61e-14	2.43e-16
GO:0015267	channel activity	F	7.88e-14	8.3e-16
GO:0005216	ion channel activity	F	7.88e-14	8.3e-16
GO:0022838	substrate-specific channel activity	F	7.88e-14	8.3e-16
GO:0022803	passive transmembrane transporter activity	F	7.88e-14	8.3e-16
GO:0007165	signal transduction	P	3.96e-12	4.28e-14
GO:0019001	guanyl nucleotide binding	F	4.96e-12	5.52e-14
GO:0044700	single organism signaling	P	1.39e-11	1.59e-13
GO:0016787	hydrolase activity	F	2.57e-11	3.01e-13
GO:0023052	signaling	P	3.08e-11	3.71e-13
GO:0032561	guanyl ribonucleotide binding	F	3.18e-11	4.02e-13
GO:0005525	GTP binding	F	3.18e-11	4.02e-13
GO:0005261	cation channel activity	F	3.57e-11	4.62e-13
GO:0043412	macromolecule modification	P	3.7e-11	4.89e-13
GO:0007154	cell communication	P	4.48e-11	6.06e-13
GO:0005244	voltage-gated ion channel activity	F	5.28e-11	7.46e-13
GO:0022832	voltage-gated channel activity	F	5.28e-11	7.46e-13
GO:0022836	gated channel activity	F	1.32e-10	1.91e-12
GO:0016772	transferase activity, transferring phosphorus-containing groups	F	3.82e-10	5.63e-12
GO:0022843	voltage-gated cation channel activity	F	5.9e-10	8.87e-12
GO:0005267	potassium channel activity	F	2.17e-09	3.33e-11
GO:0006813	potassium ion transport	P	3.53e-09	5.52e-11
GO:0043565	sequence-specific DNA binding	F	4.91e-09	7.82e-11
GO:0050896	response to stimulus	P	8.65e-09	1.41e-10
GO:0006811	ion transport	P	9.87e-09	1.63e-10
GO:0050794	regulation of cellular process	P	1.7e-08	2.87e-10
GO:0051716	cellular response to stimulus	P	1.94e-08	3.32e-10
GO:0005249	voltage-gated potassium channel activity	F	3.13e-08	5.47e-10
GO:0030001	metal ion transport	P	4.33e-08	7.68e-10
GO:0003774	motor activity	F	4.93e-08	8.9e-10
GO:0050789	regulation of biological process	P	8.98e-08	1.65e-09
GO:0035556	intracellular signal transduction	P	9.43e-08	1.76e-09
GO:0005886	plasma membrane	C	1.16e-07	2.21e-09
GO:0015079	potassium ion transmembrane transporter activity	F	1.2e-07	2.31e-09
GO:0055085	transmembrane transport	P	1.42e-07	2.78e-09
GO:0034703	cation channel complex	C	1.43e-07	2.84e-09
GO:0046873	metal ion transmembrane transporter activity	F	2.03e-07	4.1e-09
GO:0022892	substrate-specific transporter activity	F	3.34e-07	6.92e-09
GO:0022857	transmembrane transporter activity	F	3.34e-07	6.92e-09
GO:0005215	transporter activity	F	8.85e-07	1.86e-08
GO:0006796	phosphate-containing compound metabolic process	P	1.04e-06	2.22e-08
GO:0065007	biological regulation	P	1.7e-06	3.68e-08
GO:1902495	transmembrane transporter complex	C	1.97e-06	4.39e-08
GO:1990351	transporter complex	C	1.97e-06	4.39e-08
GO:0003824	catalytic activity	F	3.76e-06	8.49e-08
GO:0003777	microtubule motor activity	F	4.14e-06	9.54e-08
GO:0006793	phosphorus metabolic process	P	4.14e-06	9.59e-08
GO:0005887	integral component of plasma membrane	C	4.35e-06	1.03e-07
GO:0031226	intrinsic component of plasma membrane	C	4.35e-06	1.03e-07
GO:0071944	cell periphery	C	5.89e-06	1.42e-07
GO:0034705	potassium channel complex	C	7.03e-06	1.73e-07
GO:0008076	voltage-gated potassium channel complex	C	7.03e-06	1.73e-07
GO:0004713	protein tyrosine kinase activity	F	7.51e-06	1.87e-07
GO:0006812	cation transport	P	7.68e-06	1.94e-07
GO:0003924	GTPase activity	F	1.19e-05	3.08e-07
GO:0034702	ion channel complex	C	1.19e-05	3.09e-07
GO:0015075	ion transmembrane transporter activity	F	1.57e-05	4.1e-07
GO:0007264	small GTPase mediated signal transduction	P	1.66e-05	4.4e-07
GO:0022891	substrate-specific transmembrane transporter activity	F	1.8e-05	4.81e-07
GO:0003677	DNA binding	F	0.000104	2.85e-06
GO:0009719	response to endogenous stimulus	P	0.000104	2.86e-06
GO:0016887	ATPase activity	F	0.000114	3.17e-06
GO:0001071	nucleic acid binding transcription factor activity	F	0.000139	3.94e-06
GO:0003700	transcription factor activity, sequence-specific DNA binding	F	0.000139	3.94e-06
GO:0014070	response to organic cyclic compound	P	0.000153	4.37e-06
GO:0003676	nucleic acid binding	F	0.000203	5.86e-06
GO:0004871	signal transducer activity	F	0.000309	9.02e-06
GO:0044459	plasma membrane part	C	0.00033	9.74e-06
GO:0015672	monovalent inorganic cation transport	P	0.000404	1.2e-05
GO:0007018	microtubule-based movement	P	0.000409	1.23e-05
GO:0019538	protein metabolic process	P	0.000736	2.24e-05
GO:0071310	cellular response to organic substance	P	0.000816	2.55e-05
GO:0071495	cellular response to endogenous stimulus	P	0.000816	2.55e-05
GO:0070887	cellular response to chemical stimulus	P	0.000816	2.55e-05
GO:0000786	nucleosome	C	0.00126	4.17e-05
GO:0016020	membrane	C	0.00126	4.35e-05
GO:0009725	response to hormone	P	0.00126	4.35e-05
GO:0033993	response to lipid	P	0.00126	4.35e-05
GO:0071407	cellular response to organic cyclic compound	P	0.00126	4.35e-05
GO:0048545	response to steroid hormone	P	0.00126	4.35e-05
GO:0032870	cellular response to hormone stimulus	P	0.00126	4.35e-05
GO:0009755	hormone-mediated signaling pathway	P	0.00126	4.35e-05
GO:0071383	cellular response to steroid hormone stimulus	P	0.00126	4.35e-05
GO:0071396	cellular response to lipid	P	0.00126	4.35e-05
GO:0043401	steroid hormone mediated signaling pathway	P	0.00126	4.35e-05
GO:0042578	phosphoric ester hydrolase activity	F	0.0013	4.54e-05
GO:0006928	movement of cell or subcellular component	P	0.00143	5.06e-05
GO:0000785	chromatin	C	0.00143	5.07e-05
GO:0046872	metal ion binding	F	0.00146	5.24e-05
GO:0000413	protein peptidyl-prolyl isomerization	P	0.00149	5.43e-05
GO:0018208	peptidyl-proline modification	P	0.00149	5.43e-05
GO:0043169	cation binding	F	0.00164	6.02e-05
GO:0008324	cation transmembrane transporter activity	F	0.00184	6.81e-05
GO:0004872	receptor activity	F	0.00191	7.17e-05
GO:0060089	molecular transducer activity	F	0.00191	7.17e-05
GO:0010033	response to organic substance	P	0.00387	0.000147
GO:0044267	cellular protein metabolic process	P	0.00455	0.000174
GO:0006810	transport	P	0.00488	0.000188
GO:0051179	localization	P	0.00505	0.000196
GO:0015085	calcium ion transmembrane transporter activity	F	0.00506	0.000198
GO:0004386	helicase activity	F	0.00558	0.00022
GO:0015074	DNA integration	P	0.00699	0.00028
GO:0070588	calcium ion transmembrane transport	P	0.00699	0.00028
GO:0032993	protein-DNA complex	C	0.00721	0.000293
GO:0044815	DNA packaging complex	C	0.00721	0.000293
GO:0004725	protein tyrosine phosphatase activity	F	0.00823	0.000337
GO:0006457	protein folding	P	0.00875	0.000363
GO:0007166	cell surface receptor signaling pathway	P	0.00875	0.000363
GO:0051234	establishment of localization	P	0.00875	0.000366
GO:0005509	calcium ion binding	F	0.00965	0.000407
GO:0051260	protein homooligomerization	P	0.00973	0.000419
GO:0003755	peptidyl-prolyl cis-trans isomerase activity	F	0.00973	0.000419
GO:0016859	cis-trans isomerase activity	F	0.00973	0.000419
GO:0007167	enzyme linked receptor protein signaling pathway	P	0.0101	0.000439
GO:0038023	signaling receptor activity	F	0.0102	0.000446
GO:0051082	unfolded protein binding	F	0.0142	0.000632
GO:0004114	3',5'-cyclic-nucleotide phosphodiesterase activity	F	0.0142	0.000634
GO:0004112	cyclic-nucleotide phosphodiesterase activity	F	0.0142	0.000634
GO:0042221	response to chemical	P	0.0148	0.000662
GO:0004721	phosphoprotein phosphatase activity	F	0.0157	0.000706
GO:0007156	homophilic cell adhesion via plasma membrane adhesion molecules	P	0.0167	0.000765
GO:0098742	cell-cell adhesion via plasma-membrane adhesion molecules	P	0.0167	0.000765
GO:0099600	transmembrane receptor activity	F	0.0183	0.000842
GO:0098609	cell-cell adhesion	P	0.0185	0.000856
GO:0072509	divalent inorganic cation transmembrane transporter activity	F	0.0188	0.000879
GO:0016740	transferase activity	F	0.0201	0.000941
GO:0042623	ATPase activity, coupled	F	0.0224	0.00106
GO:0022610	biological adhesion	P	0.0234	0.00112
GO:0007155	cell adhesion	P	0.0234	0.00112
GO:0006470	protein dephosphorylation	P	0.0239	0.00116
GO:0022890	inorganic cation transmembrane transporter activity	F	0.0239	0.00116
GO:0022834	ligand-gated channel activity	F	0.0247	0.00122
GO:0005230	extracellular ligand-gated ion channel activity	F	0.0247	0.00122
GO:0015276	ligand-gated ion channel activity	F	0.0247	0.00122
GO:0019199	transmembrane receptor protein kinase activity	F	0.0288	0.00144
GO:0005262	calcium channel activity	F	0.0288	0.00144
GO:0051259	protein oligomerization	P	0.0347	0.00174
GO:0004674	protein serine/threonine kinase activity	F	0.0405	0.00205
GO:0005515	protein binding	F	0.0405	0.00206
